# Supplementary figures and images for: Hybridization of a phospholipid polymer hydrogel with a natural extracellular matrix using active cell immobilization
Source: Royal Society of Chemistry journal article supplement (doi:10.1039/c9bm00093c), 2019-01-01

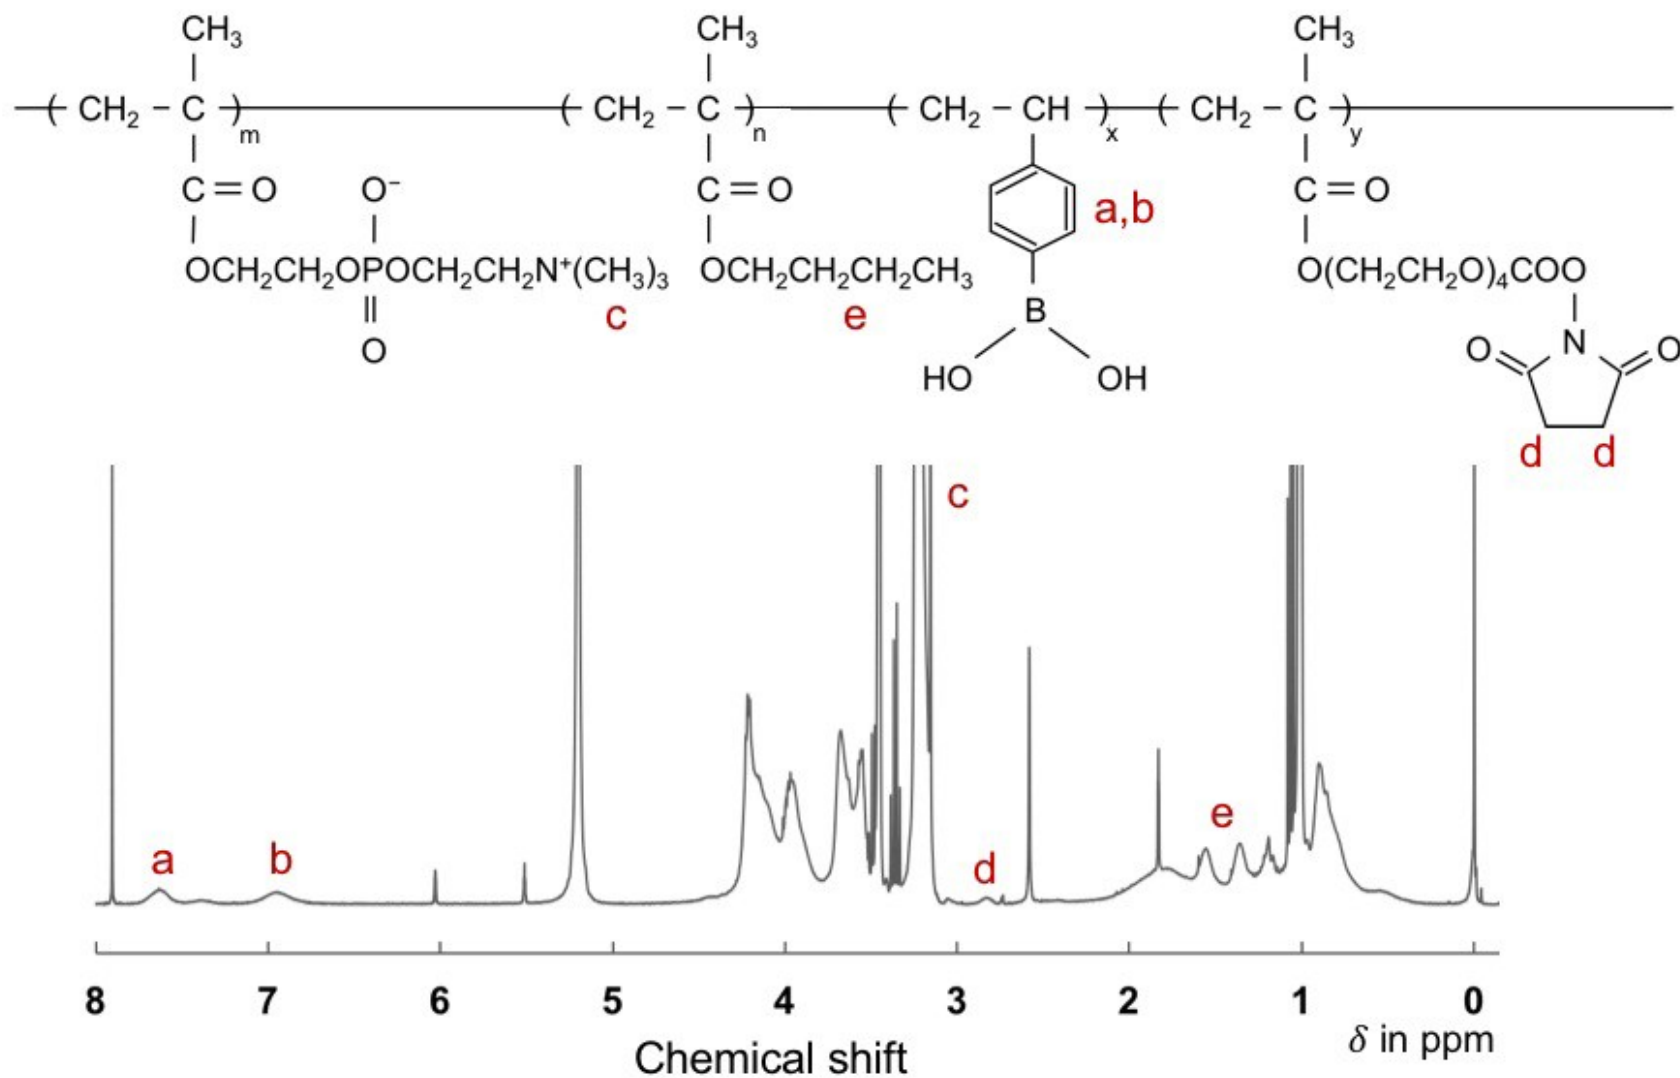

Fig. S-1

Supplement: c9bm00093c1.pdf [file c9bm00093c1.pdf]

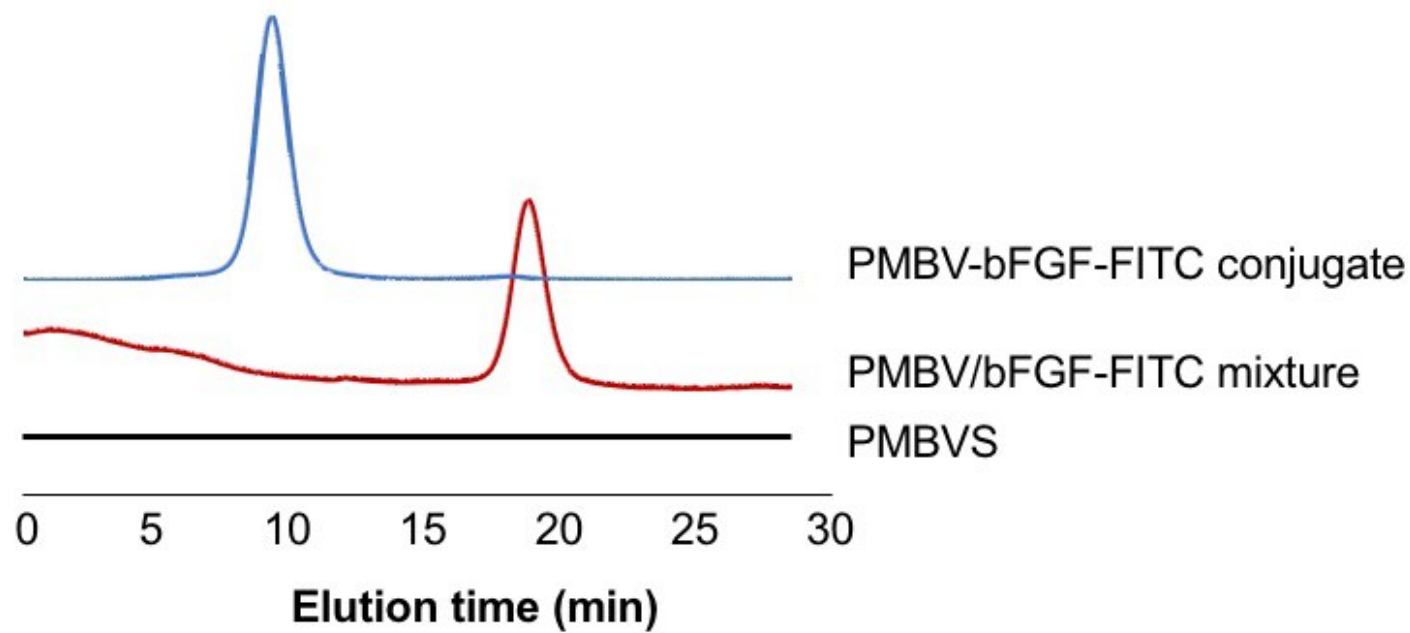

Fig. S-2

Supplement: c9bm00093c2.pdf [file c9bm00093c2.pdf]

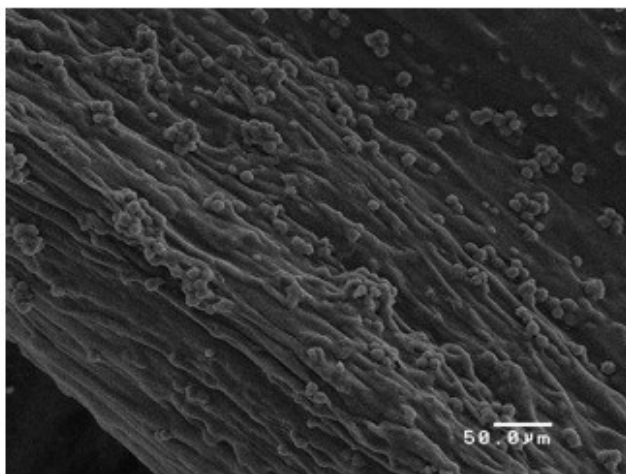

**PMBV-bFGF/PVA hydrogel  
with cell immobilization**

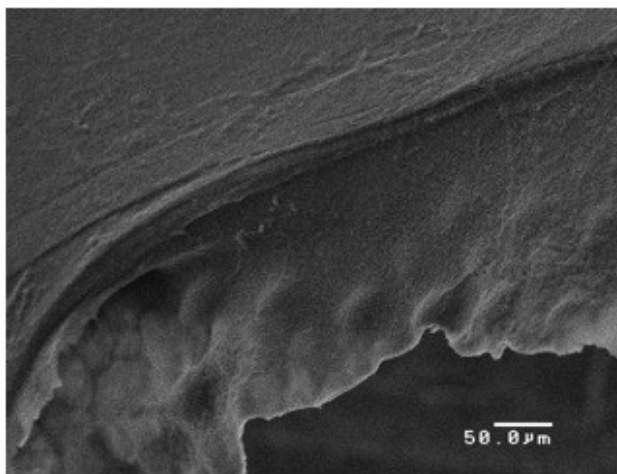

**Hydrogel matrix without cells**

Supplement: c9bm00093c3.pdf [file c9bm00093c3.pdf]
